# Supplementary material
Source: HighWire-hosted journal article supplement (https://www.cmajopen.ca/highwire/filestream/89482/field_highwire_adjunct_files/4/open-2022-0083-reporting-guideline-checklist.pdf)
Supplement: open-2022-0083-reporting-guideline-checklist.pdf [file open-2022-0083-reporting-guideline-checklist.pdf]

**Table 1**

Consolidated criteria for reporting qualitative studies (COREQ): 32-item checklist

| No                                             | Item                                     | Guide questions/description                                                                                                                      |                                          |
|------------------------------------------------|------------------------------------------|--------------------------------------------------------------------------------------------------------------------------------------------------|------------------------------------------|
| <b>Domain 1: Research team and reflexivity</b> |                                          |                                                                                                                                                  |                                          |
| Personal Characteristics                       |                                          |                                                                                                                                                  |                                          |
| 1.                                             | Interviewer/facilitator                  | Which author/s conducted the interview or focus group?                                                                                           | p. 7                                     |
| 2.                                             | Credentials                              | What were the researcher's credentials? <i>E.g. PhD, MD</i>                                                                                      | Title p. 1                               |
| 3.                                             | Occupation                               | What was their occupation at the time of the study?                                                                                              | Title p. 1                               |
| 4.                                             | Gender                                   | Was the researcher male or female?                                                                                                               | All female p. 7                          |
| 5.                                             | Experience and training                  | What experience or training did the researcher have?                                                                                             | Graduate level p. 7                      |
| Relationship with participants                 |                                          |                                                                                                                                                  |                                          |
| 6.                                             | Relationship established                 | Was a relationship established prior to study commencement?                                                                                      | Recruited through trusted food bank p. 6 |
| 7.                                             | Participant knowledge of the interviewer | What did the participants know about the researcher? <i>e.g. personal goals, reasons for doing the research</i>                                  | Part of the consent process              |
| 8.                                             | Interviewer characteristics              | What characteristics were reported about the interviewer/facilitator? <i>e.g. Bias, assumptions, reasons and interests in the research topic</i> | Inferred on p. 4 & 5                     |
| <b>Domain 2: study design</b>                  |                                          |                                                                                                                                                  |                                          |
| Theoretical framework                          |                                          |                                                                                                                                                  |                                          |
| 9.                                             | Methodological orientation and Theory    | What methodological orientation was stated to underpin the study? <i>e.g. grounded theory, discourse analysis,</i>                               | Framework method – form of               |

| No                    | Item                         | Guide questions/description                                                               |                                 |
|-----------------------|------------------------------|-------------------------------------------------------------------------------------------|---------------------------------|
|                       |                              | <i>ethnography, phenomenology, content analysis</i>                                       | thematic analysis p. 8          |
| Participant selection |                              |                                                                                           |                                 |
| 10.                   | Sampling                     | How were participants selected? <i>e.g. purposive, convenience, consecutive, snowball</i> | Purposive p. 6                  |
| 11.                   | Method of approach           | How were participants approached? <i>e.g. face-to-face, telephone, mail, email</i>        | Face to face and telephone p. 6 |
| 12.                   | Sample size                  | How many participants were in the study?                                                  | 29 p. 9                         |
| 13.                   | Non-participation            | How many people refused to participate or dropped out? Reasons?                           | 13 p. 9                         |
| Setting               |                              |                                                                                           |                                 |
| 14.                   | Setting of data collection   | Where was the data collected? <i>e.g. home, clinic, workplace</i>                         | Telephone p. 7                  |
| 15.                   | Presence of non-participants | Was anyone else present besides the participants and researchers?                         | Unknown p. 7                    |
| 16.                   | Description of sample        | What are the important characteristics of the sample? <i>e.g. demographic data, date</i>  | p. 9                            |
| Data collection       |                              |                                                                                           |                                 |
| 17.                   | Interview guide              | Were questions, prompts, guides provided by the authors? Was it pilot tested?             | p. 7                            |
| 18.                   | Repeat interviews            | Were repeat interviews carried out? If yes, how many?                                     | No                              |
| 19.                   | Audio/visual recording       | Did the research use audio or visual recording to collect the data?                       | Audio p. 7                      |
| 20.                   | Field notes                  | Were field notes made during and/or after the interview or focus group?                   | Yes p. 7                        |

| No                                    | Item                           | Guide questions/description                                                                                                              |                                                               |
|---------------------------------------|--------------------------------|------------------------------------------------------------------------------------------------------------------------------------------|---------------------------------------------------------------|
| 21.                                   | Duration                       | What was the duration of the interviews or focus group?                                                                                  | 35-40 minutes<br>p. 7                                         |
| 22.                                   | Data saturation                | Was data saturation discussed?                                                                                                           | Yes p. 6                                                      |
| 23.                                   | Transcripts returned           | Were transcripts returned to participants for comment and/or correction?                                                                 | No                                                            |
| <b>Domain 3: analysis and finding</b> |                                |                                                                                                                                          |                                                               |
| Data analysis                         |                                |                                                                                                                                          |                                                               |
| 24.                                   | Number of data coders          | How many data coders coded the data?                                                                                                     | Three p. 8                                                    |
| 25.                                   | Description of the coding tree | Did authors provide a description of the coding tree?                                                                                    | Codes emanating from guideline themes presented in appendix 2 |
| 26.                                   | Derivation of themes           | Were themes identified in advance or derived from the data?                                                                              | Both p. 8                                                     |
| 27.                                   | Software                       | What software, if applicable, was used to manage the data?                                                                               | Dedoose p. 8                                                  |
| 28.                                   | Participant checking           | Did participants provide feedback on the findings?                                                                                       | No                                                            |
| Reporting                             |                                |                                                                                                                                          |                                                               |
| 29.                                   | Quotations presented           | Were participant quotations presented to illustrate the themes / findings? Was each quotation identified? <i>e.g. participant number</i> | Yes in table 2.                                               |
| 30.                                   | Data and findings consistent   | Was there consistency between the data presented and the findings?                                                                       | Yes                                                           |
| 31.                                   | Clarity of major themes        | Were major themes clearly presented in the findings?                                                                                     | Yes                                                           |

| No  | Item                    | Guide questions/description                                            |     |
|-----|-------------------------|------------------------------------------------------------------------|-----|
| 32. | Clarity of minor themes | Is there a description of diverse cases or discussion of minor themes? | Yes |
